# Supplementary material for: Genomic, regulatory and epigenetic mechanisms underlying duplicated gene evolution in the natural allotetraploid Oryza minuta
Source: PubMed Central journal article supplement (PMC3890553; doi:10.1186/1471-2164-15-11), 2014-01-06
Supplement: 1471-2164-15-11-S1.pdf [file 1471-2164-15-11-S1.pdf]

**Table S1 Removed gene models from MSU Rice Genome Annotation Release 7**

| <b>Code</b> | <b>MSU Locus</b> | <b>Classification</b>                                   | <b>Reason to remove</b>                                                          |
|-------------|------------------|---------------------------------------------------------|----------------------------------------------------------------------------------|
| 1           | LOC_Os04g56840   | expressed protein                                       | No conserved domain evidence support, No homology in other genome                |
| 2           | LOC_Os04g56870   | retrotransposon protein, putative, unclassified         | (SZ-37 Copia) retrotransposon protein                                            |
| 3           | LOC_Os04g56880   | retrotransposon protein, putative, unclassified         | (SZ-37 Copia) retrotransposon protein                                            |
| 4           | LOC_Os04g56890   | retrotransposon protein, putative,                      | (RIRE8B Gypsy) retrotransposon protein                                           |
| 5           | LOC_Os04g56894   | hypothetical protein                                    | No transcript and conserved domain evidence support, No homology in other genome |
| 6           | LOC_Os04g56960   | hypothetical protein                                    | No transcript and conserved domain evidence support, No homology in other genome |
| 7           | LOC_Os04g57040   | hypothetical protein                                    | No transcript and conserved domain evidence support, No homology in other genome |
| 8           | LOC_Os04g57060   | retrotransposon protein, putative, unclassified         | (SZ-4 Gypsy) retrotransposon protein                                             |
| 9           | LOC_Os04g57100   | retrotransposon protein, putative, unclassified         | (SZ-33 Gypsy) retrotransposon protein                                            |
| 10          | LOC_Os04g57110   | retrotransposon protein, putative, unclassified         | (SZ-33 Gypsy) retrotransposon protein                                            |
| 11          | LOC_Os04g57154   | Putative non coding sequences                           | No ORFs were functional                                                          |
| 12          | LOC_Os04g57170   | hypothetical protein                                    | No transcript and conserved domain evidence support, No homology in other genome |
| 13          | LOC_Os04g57240   | expressed protein                                       | Wrong cDNA, No conserved domain evidence support, No homology in other genome    |
| 14          | LOC_Os04g57250   | latency associated nuclear antigen, putative, expressed | No transcript and conserved domain evidence support, No homology in other genome |
| 15          | LOC_Os04g57450   | retrotransposon protein, putative, unclassified         | (RETRO2_LTR Gypsy) retrotransposon protein                                       |
| 16          | LOC_Os04g57460   | retrotransposon protein, putative, unclassified         | (RETRO2_LTR Gypsy) retrotransposon protein                                       |
| 17          | LOC_Os04g57470   | retrotransposon protein, putative, unclassified         | (RIREX_LTR Gypsy) retrotransposon protein                                        |
| 18          | LOC_Os04g57570   | retrotransposon protein, putative, unclassified         | (SZ-55 Copia) retrotransposon protein                                            |

---

|           |                |                                                 |                                                                                  |
|-----------|----------------|-------------------------------------------------|----------------------------------------------------------------------------------|
| <b>19</b> | LOC_Os04g57580 | retrotransposon protein, putative, unclassified | retrotransposon protein                                                          |
| <b>20</b> | LOC_Os04g57620 | hypothetical protein                            | No transcript and conserved domain evidence support, No homology in other genome |

---

**Table S2 Gene annotation results for three *Oryza* species compared with *japonica* models**

| Uniform gene name | TIGR model (V6)LOC_Os | Gene annotation |      |      |      |    | Structure variation information             |
|-------------------|-----------------------|-----------------|------|------|------|----|---------------------------------------------|
|                   |                       | AA              | BB   | BC_B | BC_C | CC |                                             |
| <b>1</b>          | 56800                 | 1               | 1    | NS   | NS   | NS | BB1 Structure variation                     |
| <b>2-1</b>        | 56810                 | 2-1             | 2-1  | NS   | NS   | NS |                                             |
| <b>2-2</b>        | 56820                 | 2-2             | 2-2  | NS   | NS   | NS | BB2-2 transcript orientation reverse        |
| <b>4</b>          | 56850                 | 4               | 4    | NS   | NS   | NS |                                             |
| <b>5-1</b>        | 56900                 | 5-1             | 5-1  | NS   | NS   | NS |                                             |
| <b>5-2</b>        | 56910                 | 5-2             | 5-2  | NS   | NS   | NS |                                             |
| <b>6-1</b>        | 56920                 | 6-1             | 6-1  | NS   | NS   | NS |                                             |
| <b>6-2</b>        | 56930                 | 6-2             | 6-2  | NS   | NS   | NS |                                             |
| <b>7</b>          | 56939                 | 7               | 7    | NS   | NS   | NS |                                             |
| <b>8</b>          | 56950                 | 8               | 8    | NS   | NS   | NS |                                             |
| <b>9</b>          | 56970                 | 9               | 9    | 9    | NS   | NS |                                             |
| <b>10</b>         | 56980                 | 10              | 10   | 10   | NS   | NS |                                             |
| <b>11</b>         | 56990                 | 11              | 11   | 11   | NS   | NS |                                             |
| <b>12</b>         | 56995                 | 12              | 12   | 12   | NS   | NS |                                             |
| <b>13</b>         | 57010                 | 13              | 13   | 13   | NS   | NS |                                             |
| <b>14</b>         | 57020                 | 14              | 14   | 14   | NS   | NS |                                             |
| <b>15</b>         | 57030                 | 15              | 15   | 15   | NS   | NS |                                             |
| <b>16-1</b>       | 57050                 | 16-1            | 16-1 | 16-1 | NS   | NS | second exon short (caused by LTR insertion) |
| <b>16-2</b>       | 57070                 | 16-2            | -    | -    | NS   | NS |                                             |
| <b>16-3</b>       | 57080                 | 16-3            | 16-3 | 16-3 | NS   | NS |                                             |

**Table S2 Continued**

| Uniform gene name | TIGR model (V6)LOC_Os | Gene annotation |      |      |      |      | Structure variation information |
|-------------------|-----------------------|-----------------|------|------|------|------|---------------------------------|
|                   |                       | AA              | BB   | BC_B | BC_C | CC   |                                 |
| 16-4              | 57090                 | 16-4            | 16-4 | 16-4 | NS   | NS   |                                 |
| 17                | 57130                 | 17              | 17   | 17   | 17   | 17   |                                 |
| 18                | 57140                 | 18              | 18   | 18   | 18   | 18   |                                 |
| 19                | 57150                 | 19              | 19   | 19   | 19   | 19   |                                 |
| 21-1              | 57160                 | 21-1            | 21-1 | 21-1 | 21-1 | 21-1 |                                 |
| 21-2              | 57180                 | 21-2            | 21-2 | 21-2 | 21-2 | 21-2 |                                 |
| 22                | 57190                 | 22              | 22   | 22   | P    | 22   | Sequence deletion               |
| 23                | 57200                 | 23              | 23   | 23   | 23   | 23   |                                 |
| 24                | 57210                 | 24              | 24   | 24   | 24   | 24   |                                 |
| 25                | 57220                 | 25              | 25   | 25   | 25   | 25   |                                 |
| 26                | 57230                 | 26              | 26   | 26   | P    | 26   | premature stop codon            |
| 29-4              | -                     | -               | 29-4 | 29-4 | 29-4 | 29-4 | similar to AA gene 29 family    |
| 29-1              | 57260                 | 29-1            | 29-1 | 29-1 | 29-1 | 29-1 |                                 |
| 29-2              | 57270                 | 29-2            | 29-2 | 29-2 | -    | 29-2 |                                 |
| 29-3              | 57280                 | 29-3            | 29-3 | 29-3 | 29-3 | 29-3 |                                 |
| 30                | 57290                 | 30              | 30   | 30   | 30   | 30   |                                 |
| 31                | 57300                 | 31              | 31   | 31   | 31   | 31   |                                 |
| 32                | 57310                 | 32              | 32   | 32   | 32   | 32   |                                 |
| 33                | 57320                 | 33              | 33   | 33   | 33   | 33   |                                 |
| 34                | 57330                 | 34              | 34   | 34   | 34   | 34   |                                 |
| 35                | 57340                 | 35              | 35   | 35   | 35   | 35   |                                 |
| 36                | 57350                 | 36              | 36   | 36   | 36   | 36   |                                 |
| 37                | 57360                 | 37              | 37   | 37   | 37   | 37   |                                 |
| 38-1              | 57370                 | 38-1            | 38-1 | 38-1 | 38-1 | 38-1 |                                 |
| 38-2              | 57380                 | 38-2            | 38-2 | 38-2 | 38-2 | 38-2 |                                 |
| 38-3              | 57390                 | 38-3            | 38-3 | P    | 38-3 | 38-3 | Premature stop codon            |
| 39-1              | 57400                 | 39-1            | 39-1 | 39-1 | 39-1 | 39-1 |                                 |
| 39-2              | 57410                 | 39-2            | -    | -    | -    | -    |                                 |

**Table S2 Continued**

| Uniform gene name | TIGR model (V6)LOC_Os | Gene annotation |           |           |           |           | Structure variation information                              |
|-------------------|-----------------------|-----------------|-----------|-----------|-----------|-----------|--------------------------------------------------------------|
|                   |                       | AA              | BB        | BC_B      | BC_C      | CC        |                                                              |
| 40                | 57420                 | 40              | 40        | 40        | 40        | 40        |                                                              |
| 41                | 57430                 | 41              | 41        | 41        | 41        | 41        | Rice 41: structure change (have two exon), other single exon |
| 42                | 57440                 | 42              | 42        | 42        | 42        | 42        |                                                              |
| 43                | 57480                 | 43              | 43        | 43        | P         | 43        | LTR insertion                                                |
| 44                | 57490                 | 44              | 44        | 44        | 44        | 44        |                                                              |
| 45                | 57500                 | 45              | 45        | 45        | 45        | 45        |                                                              |
| 46                | 57510                 | 46              | 46        | 46        | 46        | 46        | Gap                                                          |
| 47                | 57520                 | 47              | 47        | 47        | 47        | 47        | Gap                                                          |
| 48                | 57530                 | 48              | 48        | 48        | 48        | 48        |                                                              |
| 49                | 57540                 | 49              | 49        | 49        | 49        | 49        |                                                              |
| 50-1              | 57550                 | 50-1            | 50-1      | 50-1      | 50-1      | 50-1      |                                                              |
| 50-2              | 57560                 | 50-2            | 50-2      | 50-2      | 50-2      | 50-2      |                                                              |
| 51                | 57590                 | 51              | 51        | 51        | 51        | 51        |                                                              |
| 52                | 57600                 | 52              | 52        | 52        | 52        | 52        |                                                              |
| 53                | 57610                 | 53              | 53        | 53        | 53        | 53        |                                                              |
| 54-1              | 57630                 | 54-1            | NS        | 54-1      | 54-1      | 54-1      |                                                              |
| 55                | 57640                 | 55              | NS        | 55        | 55        | 55        |                                                              |
| 56                | 57650                 | 56              | NS        | 56        | 56        | 56        |                                                              |
| 54-2              | 57660                 | 54-2            | NS        | 54-2      | -         | NS        |                                                              |
| 57                | 57670                 | 57              | NS        | 57        | 57        | NS        |                                                              |
| 58                | 57680                 | 58              | NS        | 58        | NS        | NS        |                                                              |
| 59                | 57690                 | 59              | NS        | 59        | NS        | NS        |                                                              |
| 60                | 57700                 | 60              | NS        | NS        | NS        | NS        |                                                              |
| <b>Total</b>      | <b>70</b>             | <b>72</b>       | <b>61</b> | <b>58</b> | <b>44</b> | <b>44</b> |                                                              |
| <b>count</b>      |                       |                 |           |           |           |           |                                                              |

Note: “-” indicates not present; “NS” indicates no sequences were covered by BAC sequencing; “P” indicates pseudo gene; Genes 17–53 are core genes used to investigate duplicated gene evolution in our analysis. The code is not continuous because we maintained the original code for each gene model after deleting some gene models in order to not affect other analysis.

**Table S3 Annotation details of LTR retrotransposon in four *Oryza* genomes**

| Species          | Family       | Name        | Position and structure features                                                                                                                                                                                                                                                                                                                                 | Strand | TSD(+strand 5'-3') | Ks     | Divergent time (Mya) |
|------------------|--------------|-------------|-----------------------------------------------------------------------------------------------------------------------------------------------------------------------------------------------------------------------------------------------------------------------------------------------------------------------------------------------------------------|--------|--------------------|--------|----------------------|
| <i>O. sativa</i> |              |             |                                                                                                                                                                                                                                                                                                                                                                 |        |                    |        |                      |
| <b>Solo LTR</b>  | <i>Gypsy</i> | SZ-19_LTR   | 9180-10762                                                                                                                                                                                                                                                                                                                                                      | C      | GCGAT              |        |                      |
|                  | <i>Gypsy</i> | SZ-44_LTR   | 11165-12552                                                                                                                                                                                                                                                                                                                                                     | C      | CCTCC              |        |                      |
|                  | <i>Gypsy</i> | Gypsy-A_LTR | 67264-70544                                                                                                                                                                                                                                                                                                                                                     | C      | GTGGT              |        |                      |
|                  | <i>Copia</i> | COPI1_LTR   | 457506-457793                                                                                                                                                                                                                                                                                                                                                   | C      | ATTAG              |        |                      |
| <b>LTR</b>       | <i>Copia</i> | SZ-37_LTR   | Location:26713-38769 Len: 12057 Strand:-<br>5'-LTR: 26713-28296 Len: 1584 3'-LTR: 37186-38769 Len: 1584<br>5'-TG: TG , TG 3'-CA: CA , CA TSR: 26708-26712 , 38770-38774<br>[GCAGC]<br>PBS: [14/17] 37164-37180 (-MetCAT) GAGACCAAGCTCTGATA<br>PPT: [13/15] 28297-28311 ATCTCCCCCTTTTG                                                                           | C      | GCAGC              | 0.0265 | 1.01923              |
|                  | <i>Gypsy</i> | SZ-33_LTR   | Location:155433-166868 Len: 11436 Strand:-<br>5'-LTR:155433-156008 Len: 576 3'-LTR:166296-166868 Len: 573<br>5'-TG :TG , TG 3'-CA :CT , CA TSR :155428-155432 , 166869-166873<br>[AATAT]<br>PBS:[15/15] 166277-166291 (-ArgCCT) CCCCTACCTGGCGCG<br>PPT:[11/15] 156053-156067 GTTGTCGTCGTTCTT<br>Domain: 160347-160850 [possible ORF:160002-160850, (IN (core))] |        |                    | 0.0458 | 1.7615               |
|                  | <i>Gypsy</i> | RETRO2_LTR  | Location : 308064-320959 Len: 12896 Strand:-<br>5'-LTR:308064-309139 Len: 1076 3'-LTR:319878-320959 Len: 1082<br>5'-TG :TG , TG 3'-CA :CA , CA TSR :308059-308063 , 320960-320964<br>[AGAAC]                                                                                                                                                                    | C      | AGAAC              | 0.0056 | 0.2153               |

---

|              |           |  |                                                                  |   |       |        |         |
|--------------|-----------|--|------------------------------------------------------------------|---|-------|--------|---------|
|              |           |  | PBS:[15/15] 319858-319872 (-ArgCCT) CCCCTACCTGGCGCG              |   |       |        |         |
|              |           |  | PPT:[11/15] 309163-309177 GCGATTACCCTCCTC                        |   |       |        |         |
|              |           |  | Domain: 314018-314506 [possible ORF:313637-314992, (IN (core))]  |   |       |        |         |
|              |           |  | Domain: 315038-315427 [possible ORF:314993-316279, (RNase H)]    |   |       |        |         |
|              |           |  | Domain: 316626-317081 [possible ORF:316515-317363, (RT)]         |   |       |        |         |
| <i>Gypsy</i> | RIREX_LTR |  | Location : 321446-329814 Len: 8369 Strand:-                      | C | CGTGG | 0.0000 | 0       |
|              |           |  | 5'-LTR:321446-321875 Len: 430 3'-LTR:329390-329814 Len: 425      |   |       |        |         |
|              |           |  | 5'-TG :TG , TG 3'-CA :CA , CA TSR :321441-321445 , 329815-329819 |   |       |        |         |
|              |           |  | [CGTGG]                                                          |   |       |        |         |
|              |           |  | PBS:[15/15] 329370-329384 (-ArgCCT) CCCCTACCTGGCGCG              |   |       |        |         |
|              |           |  | PPT:[11/15] 321909-321923 ATCTTCTCTCGAACC                        |   |       |        |         |
| <i>Copia</i> | SZ-55_LTR |  | Location : 385697-396005 Len: 10309 Strand:-                     | C | ATTGG | 0.0030 | 0.11538 |
|              |           |  | 5'-LTR:385697-387319 Len: 1623 3'-LTR:394390-396005 Len: 1616    |   |       |        |         |
|              |           |  | 5'-TG :TG , TG 3'-CA :CA , CA TSR :385692-385696 , 396006-396010 |   |       |        |         |
|              |           |  | [ATTGG]                                                          |   |       |        |         |
|              |           |  | PBS:[14/15] 394370-394384 (-MetCAT)AACCGGGCTCTGATA               |   |       |        |         |
|              |           |  | PPT:[11/15] 387320-387334ATCTCCCCCTTGATG                         |   |       |        |         |
|              |           |  | Domain: 390692-391192 [possible ORF:388625-391780, (IN (core))]  |   |       |        |         |

---

***O. punctata***

**SoloLTR**

|                 |              |                |   |                   |
|-----------------|--------------|----------------|---|-------------------|
| COPIA3-LTR      | <i>Copia</i> | 342283..342552 | C | 5'_GCCTTAG        |
|                 |              |                |   | 3'_ACCTTAG        |
| ATLANTYS-LTR_OS | <i>Gypsy</i> | 84424..85889   | C | GAGGG             |
| SZ-37_LTR       | <i>Copia</i> | 89863..91316   |   | 5'_GAGGT 3'_AAGGT |

---

|                         |                 |              |                                                                                                                                                                                                                                                                                                                                                                                                                                             |   |                   |        |          |
|-------------------------|-----------------|--------------|---------------------------------------------------------------------------------------------------------------------------------------------------------------------------------------------------------------------------------------------------------------------------------------------------------------------------------------------------------------------------------------------------------------------------------------------|---|-------------------|--------|----------|
| <b>LTR</b>              | RN10LTR         | <i>Gypsy</i> | Location:63674-68867 Len:5194 Strand: 5'-LTR:63674-63935 Len:262<br>3'-LTR:68605-68867 Len:263 5'-TG:TG,TG 3'-CA:CA ,CA<br>TSR:63669-63673,68868-68872 [AGATC] PPT:[12/15] 63936-63950<br>TTCCCCTCCGCTTGA Domain: 64550-65044 [possible<br>ORF:63908-66004, (IN (core)]                                                                                                                                                                     | C | AGATC             | 0.0231 | 0.88846  |
| <b><i>O. minuta</i></b> |                 |              |                                                                                                                                                                                                                                                                                                                                                                                                                                             |   |                   |        |          |
| <b>(BB )</b>            |                 |              |                                                                                                                                                                                                                                                                                                                                                                                                                                             |   |                   |        |          |
| <b>SoloLTR</b>          | ATLANTYS-LTR_OS | <i>Gypsy</i> | 19929-21409                                                                                                                                                                                                                                                                                                                                                                                                                                 |   | CGTGG             |        |          |
|                         | ATLANTYS-LTR_OS | <i>Gypsy</i> | 21666-23133                                                                                                                                                                                                                                                                                                                                                                                                                                 | C | TSD_GAGGG         |        |          |
|                         | SZ-37_LTR       | <i>Copia</i> | 24485-25964                                                                                                                                                                                                                                                                                                                                                                                                                                 |   | 5'_GAGGT_3'_AAGGT |        |          |
| <b>LTR</b>              | OSTONORI_LTR    | <i>Copia</i> | Location : 288119 - 294442 Len: 6324 Strand:-<br>5'-LTR : 288119 - 288572 Len: 454 3'-LTR : 293988 - 294442 Len:<br>455<br>5'-TG : TG , TG 3'-CA : CA , CA TSR : 288114 - 288118 ,<br>294443- 294447 [TGGAC]<br>PBS : [15/16] 293968 - 293983 (-MetCAT)<br>PBS: ACTCCTAAACCTTGCTCTGATACCAT<br>MetCAT: AAACCTTGCTCTGATA<br>PPT : [14/15] 288592 - 288606 CCTTCTTACTTCTC<br>Domain: 290932 - 291393 [possible ORF:290929-292326, (IN (core))] | C | TGGAC             | 0.0203 | 0.780769 |
|                         | SZ-54A_LTR      | <i>Gypsy</i> | Location : 369974 - 375174 Len: 5201 Strand:-<br>5'-LTR : 369974 - 370370 Len: 397 3'-LTR : 374737 - 375174 Len:<br>438<br>5'-TG : TG , TG 3'-CA : CA , CA TSR : 369970 - 369973 ,<br>375175- 375178 [GTAT]<br>PBS : [14/17] 374678 - 374694 (-AsnGTT) TGCTGGTGG--TGGGGA                                                                                                                                                                    | C | GTAT              | 0.1049 | 4.034615 |



PPT : [13/15] 370371- 370385 TCTCTCCCCACCTCG  
 Domain: 371078 - 371458 [possible ORF:371075-371788, (IN (core))]  
 Domain: 372579 - 373004 [possible ORF:372366-373529, (RT)]

***O. minuta***  
**(CC)**

|                 |           |              |                                               |   |       |
|-----------------|-----------|--------------|-----------------------------------------------|---|-------|
| <b>Solo LTR</b> | COPIO_LTR | <i>Copia</i> | 91722-93161                                   |   | GTGCC |
|                 | SZ-31_LTR | <i>Gypsy</i> | 117166-118179                                 |   | NO    |
|                 | SZ-7_LTR  | <i>Gypsy</i> | 186783-187351                                 |   | NO    |
|                 | SZ-37_LTR | <i>Copia</i> | 188398-189845                                 | C | ACCGC |
| <b>LTR</b>      | SC-3_LTR  | <i>Copia</i> | Location : 210156 - 215361 Len: 5206 Strand:+ |   | GAATC |

5'-LTR : 210156 - 210524 Len: 369 3'-LTR : 215014 - 215361 Len: 348  
 5'-TG : TG , TG 3'-CA : CA , TA TSR : 210151 - 210155 ,  
 215362 - 215366 [GAATC]  
 PBS : [16/18] 210530 - 210547 (MetCAT) TATCAGAGCCACACTTTC  
 PPT : [12/15] 214917 - 214931 GAATGATGGAATAAG  
 Domain: 212915 - 213445 [possible ORF:212219-213514, (IN (core))]

***O. officinalis***(CC)

|                 |                 |              |               |   |                 |
|-----------------|-----------------|--------------|---------------|---|-----------------|
| <b>Solo LTR</b> | SZ-44_LTR       | <i>Gypsy</i> | 42159-43518   | C | TTTAT           |
|                 | COPIO_LTR       | <i>Copia</i> | 98043-99415   |   | 5_GTGTC_3_GTGCC |
|                 | ATLANTYS-LTR_OS | <i>Gypsy</i> | 101401-102980 |   | AGTTA           |
|                 | SZ-33_LTR       | <i>Gypsy</i> | 185108-185704 |   | NO              |

|            |           |              |                                                                                                                                                                                                                                                                                                                                                                                                                                      |   |                 |        |          |
|------------|-----------|--------------|--------------------------------------------------------------------------------------------------------------------------------------------------------------------------------------------------------------------------------------------------------------------------------------------------------------------------------------------------------------------------------------------------------------------------------------|---|-----------------|--------|----------|
|            | SZ-7_LTR  | <i>Gypsy</i> | 263762-264330                                                                                                                                                                                                                                                                                                                                                                                                                        |   | 5_ATCCT_3_ACCCT |        |          |
|            | SZ-37_LTR | <i>Copia</i> | 265256-266675                                                                                                                                                                                                                                                                                                                                                                                                                        | C | ACCGC           |        |          |
| <b>LTR</b> | SC-3_LTR  | <i>Copia</i> | Location : 66128 - 71917 Len: 5790 Strand:+<br>5'-LTR : 66128 - 66431 Len: 304 3'-LTR : 71569 - 71917 Len: 349<br>5'-TG : TG , TG 3'-CA : CA , CA TSR : 66123 - 66127 ,<br>71918 - 71922 [GATCA]<br>PBS : [16/21] 66452 - 66472 (LysTTT)<br>CGTCGTCTGTGGGACAATTG<br>PPT : [14/15] 71510 - 71524 AGGGAAGGGGTGGAA                                                                                                                      |   | GATCA           | 0.0144 | 0.553846 |
|            | SZ_LTR    | <i>Gypsy</i> | Location : 174363 - 184310 Len: 9948 Strand:-<br>5'-LTR : 174363 - 175311 Len: 949<br>3'-LTR : 183360 - 184310 Len: 951<br>5'-TG : TG , TG<br>3'-CA : CA , CA<br>TSR : 174358 - 174362 , 184311 - 184315 [CCATC]<br>PBS : [17/18] 183337 - 183354 (-ArgCCT)<br>PPT : [11/15] 175375 - 175389<br>Domain: 180094 - 180594 [possible ORF:179518-181023, (IN (core))]<br>Domain: 181113 - 181451 [possible ORF:180954-181451, (RNase H)] | C | CCATC           | 0.0066 | 0.253846 |

---

|              |              |                                                                          |    |        |         |
|--------------|--------------|--------------------------------------------------------------------------|----|--------|---------|
| ATLANTYS_LTR | <i>Gypsy</i> | Location : 144468 - 153335 Len: 8868 Strand:+                            | No | 0.1356 | 5.21538 |
|              |              | 5'-LTR : 144468 - 146046 Len: 1579 3'-LTR : 151758 - 153335 Len:<br>1578 |    |        |         |
|              |              | 5'-TG : TG , TG 3'-CA : CA , CA TSR : NOT FOUND                          |    |        |         |
|              |              | PBS : [14/16] 146075 - 146090 (CysGCA) GCGGCAGCCCAAGAT                   |    |        |         |
|              |              | PPT : [11/15] 151663 - 151677 ACGATAGATTAGGGA                            |    |        |         |
|              |              | Domain: 150652 - 151053 [possible ORF:150040-151674, (RNase H)]          |    |        |         |
|              |              | Domain: 151453 - 151671 [possible ORF:150040-151674, (IN (core))]        |    |        |         |

---

**Table S4 Intact elements of DNA transposons across the *Sh4* region**

| Species                      | Family        | Name     | Position      | Strand | TSD(+strand 5'-3')        |
|------------------------------|---------------|----------|---------------|--------|---------------------------|
| <b><i>O. sativa</i> (AA)</b> |               |          |               |        |                           |
| <b>DNA transposon</b>        | OSTE30        | Other    | 46781-47297   | C      | GTCTTGAC                  |
|                              | STOWAWAY8_OS  | Stowaway | 59189-59446   | C      | TA                        |
|                              | CLOUD-3       | MuDR     | 64058-64610   | C      | CCTTTTTA                  |
|                              | TREP215       | Stowaway | 65663-65897   | C      | TA                        |
|                              | TREP215       | Stowaway | 71667-71905   |        | TA                        |
|                              | STOWAWAY1_OS  | Stowaway | 89304-89431   | C      | TA                        |
|                              | CLOUD-7       | MuDR     | 97827-98291   | C      | TTTTAAT                   |
|                              | TYPEU4        | Other    | 133191-133583 |        | 5'_TAATGAATC 3'_CAATGAATC |
|                              | STOWAWAY10_OS | Stowaway | 134462-134721 |        | TA                        |
|                              | TYPEU         | MuDR     | 150954-151310 |        | T                         |
|                              | DITTO         | Tourist  | 168321-168558 | C      | TTA                       |
|                              | STOWAWAY46_OS | Stowaway | 177967-178114 | C      | TA                        |
|                              | STOWAWAY21_OS | Stowaway | 189782-190017 | C      | TA                        |
|                              | TREP219       | Stowaway | 195439-195541 |        | TA                        |
|                              | STOWAWAY1_OS  | Stowaway | 202010-202158 | C      | TA                        |
|                              | INDITTO       | Tourist  | 202407-202671 | C      | TTA                       |
|                              | Gaijin        | Tourist  | 203155-203297 | C      | TAA                       |
|                              | STOWAWAY43_OS | Stowaway | 203418-203712 |        | TA                        |
|                              | STOWAWAY21_OS | Stowaway | 204256-204489 |        | TA                        |
|                              | STOWAWAY18_OS | Stowaway | 213683-213897 | C      | TA                        |
|                              | TYPEU4        | Other    | 236145-236516 | C      | ATAGAAAAA                 |
|                              | STOWAWAY9_OS  | Stowaway | 237245-237474 | C      | TA                        |
|                              | OLO24         | Tourist  | 240847-241189 |        | 5'_TGT 3'_TAT             |
|                              | AMYLTP        | Tourist  | 267093-267464 |        | TTAGTTGCC                 |
|                              | STOWAWAY21_OS | Stowaway | 267675-267908 | C      | TA                        |
|                              | OLO24         | Tourist  | 268199-268517 | C      | CTT                       |
|                              | Gaijin        | Tourist  | 270769-270915 |        | AGA                       |
|                              | Gaijin        | Tourist  | 278781-278927 |        | ACA                       |
|                              | STOWAWAY50_OS | Stowaway | 290204-290324 |        | 5'_CA 3'_TA               |
|                              | STOWAWAY41_OS | Stowaway | 293620-293879 |        | TA                        |
|                              | Gaijin        | Tourist  | 301973-302109 | C      | TAT                       |
|                              | STOWAWAY51_OS | Stowaway | 302133-302364 | C      | NO                        |
|                              | CLOUD         | MuDR     | 343091-343836 | C      | TAAATAATA                 |
|                              | TYPEG         | MuDR     | 351168-351594 | C      | TTGTTATGA                 |
|                              | Explorer      | Tourist  | 356055-356274 |        | 5'_TAC 3'_TAT             |
|                              | INDITTO       | Tourist  | 358224-358490 | C      | TTA                       |
|                              | CLOUD-4       | MuDR     | 402553-403056 | C      | TTTAATTTA                 |
|                              | STOWAWAY1_OS  | Stowaway | 410693-410842 |        | TA                        |
|                              | DITTO         | Tourist  | 416896-417132 |        | TAA                       |

|               |           |               |   |           |
|---------------|-----------|---------------|---|-----------|
| STOWAWAY21_OS | Stowaway  | 424486-424717 | C | TA        |
| UNIQUE        | Tourist   | 427534-427679 |   | TTG       |
| MPING         | MITE/Tapo | 433777-434206 |   | TTA       |
|               | go        |               |   |           |
| Gaijin        | Tourist   | 434987-435133 |   | TTT       |
| STOWAWAY46_OS | Stowaway  | 435675-435826 |   | TA        |
| STOWAWAY41_OS | Stowaway  | 437887-438137 | C | TA        |
| TELIA         | Other     | 441458-441598 | C | TTTAAAAAA |
| STOWAWAY9_OS  | Stowaway  | 456839-457033 | C | TA        |
| QIQI          | Tourist   | 458610-458909 |   | TAA       |
| STOWAWAY46_OS | Stowaway  | 474661-474783 | C | TA        |

***O. punctata*(BB)**

**DNA transposon**

|                     |          |                                 |   |                       |
|---------------------|----------|---------------------------------|---|-----------------------|
| STOWAWAY16_OS       | Stowaway | 35127-35350                     |   | 5'_no 3'_TA           |
| TYPEU               | MuDR     | 48732-49091                     | C | no                    |
| STOWAWAY43_OS       | Stowaway | 76831-77062                     |   | TA                    |
| ENSPM2_OS           | En/Spm   | 118682-119377,<br>122096-122356 | C | TAG                   |
| STOWAWAY15-2_<br>OS | Stowaway | 137614-137759                   |   | TA                    |
| TREP220             | Stowaway | 159341-159462                   |   | TA                    |
| Explorer            | Tourist  | 165667-165886                   |   | no                    |
| CLOUD-6             | MuDR     | 167427-167916                   |   | TTATTTT               |
| STOWAWAY34_OS       | Stowaway | 196549-196805                   |   | TA                    |
| TYPEU4              | Other    | 211332-211711                   | C | 5'_ACAGAGA 3'_ACAAAGA |
| TYPEU4              | Other    | 233204-233586                   |   | AT                    |
| WANDERER_OS         | Tourist  | 261085-261324                   | C | TTA                   |
| QIQI                | Tourist  | 313665-313965                   |   | 5'_TTA 3'_TCA         |
| STOWAWAY46_OS       | Stowaway | 314787-314931                   |   | TA                    |
| STOWAWAY41_OS       | Stowaway | 322735-322985                   |   | TA                    |
| F804                | Other    | 332325-332493                   |   | TATTTTATC             |
| TREP220             | Stowaway | 332713-332822                   | C | TA                    |

***O. minuta* (BB )**

**DNA transposon**

|               |          |                             |   |                     |
|---------------|----------|-----------------------------|---|---------------------|
| STOWAWAY43_OS | Stowaway | 6527-6758                   |   | TA                  |
| ENSPM2_OS     | En/Spm   | 49479-50147,52<br>948-53209 | C | ?                   |
| STOWAWAY46_OS | Stowaway | 68261-68408                 | C | TA                  |
| TREP220       | Stowaway | 90056-90177                 |   | TA                  |
| Explorer      | Tourist  | 96728-96946                 |   | 5'_CTC_3'_CTA       |
| CLOUD-6       | MuDR     | 98495-99014                 |   | TTATTTT             |
| STOWAWAY34_OS | Stowaway | 127311-127567               |   | TA                  |
| TYPEU4        | Other    | 175018-175401               |   | AT                  |
| WANDERER_OS   | Tourist  | 183491-183731               | C | TAA                 |
| OSTE24        | Other    | 201085-201709               | C | 5'_CGAGCG_3'_CGAGGG |

|               |          |               |   |               |
|---------------|----------|---------------|---|---------------|
| Gaijin        | Tourist  | 211812-211950 | C | ATA           |
| WANDERER_OS   | Tourist  | 213140-213380 | C | TTA           |
| STOWAWAY41_OS | Stowaway | 218561-218825 | C | TA            |
| DITTO3        | Tourist  | 229668-229905 |   | 5'_TAA_3'_no  |
| STOWAWAY10_OS | Stowaway | 239041-239294 | C | 5'_TA_3'_TG   |
| QIQI          | Tourist  | 263045-263345 |   | 5'_TTA_3'_TTT |
| STOWAWAY46_OS | Stowaway | 264162-264316 | C | TA            |
| STOWAWAY41_OS | Stowaway | 272054-272305 |   | TA            |
| F804          | Other    | 281610-281776 |   | TATTTTATC     |
| TREP220       | Stowaway | 281998-282107 | C | TA            |
| Gaijin        | Tourist  | 326852-326990 | C | no            |
| STOWAWAY47_OS | Stowaway | 350011-350147 | C | TA            |

---

***O. minuta* (CC)**

**DNA transposon**

|               |          |               |   |                                                                                                                                               |
|---------------|----------|---------------|---|-----------------------------------------------------------------------------------------------------------------------------------------------|
| TESS          | hAT      | 18347-18570   | C | GTTAGCAC                                                                                                                                      |
| TREP219       | Stowaway | 46207-46303   |   | TA                                                                                                                                            |
| STOWAWAY41_OS | Stowaway | 58958-59218   | C | TA                                                                                                                                            |
| TYPEU4        | Other    | 93334-93711   | C | ATAGAAAAA                                                                                                                                     |
| STOWAWAY46_OS | Stowaway | 105114-105280 | C | 5'_TA_3'_TG                                                                                                                                   |
| STOWAWAY18_OS | Stowaway | 304496-304711 |   | 5'_TG_3'_TA                                                                                                                                   |
| TNR2A         | Other    | 308362-308516 |   | 5'_CGGTTTCAACTTCGGGG_3'_TCTCTTCAACTTG<br>AGGG                                                                                                 |
| STOWAWAY47_OS | Stowaway | 308795-308930 | C | TA                                                                                                                                            |
| OSTE23        | Other    | 316063-316257 | C | 5'_AAATCAAACAGCTAGCTATAGGAAGGATCAA<br>TGGTGAGCATGCATTTGGTTTTTTTTTGC_3'_AAG<br>ATGACTGTATATGAAAGCAATTAATTAATTAGTCAT<br>GACCCTGTTCTTCGTTTCTTTGC |
| STOWAWAY41_OS | Stowaway | 318492-318749 |   | TA                                                                                                                                            |
| STOWAWAY47_OS | Stowaway | 320371-320517 |   | TA                                                                                                                                            |
| MUDRN1_OS     | MuDR     | 338116-338852 | C | 5'_GTATATTTTCA_3'_GTATACATTCT                                                                                                                 |
| STOWAWAY42_OS | Stowaway | 340486-340728 |   | TA                                                                                                                                            |
| MDM2          | MuDR     | 349525-349818 | C | TTAATTTTA                                                                                                                                     |

---

***O. officinalis*(CC)**

**DNA transposon**

|               |          |               |   |                                               |
|---------------|----------|---------------|---|-----------------------------------------------|
| TESS          | hAT      | 20622-20845   | C | GTTAGCAC                                      |
| TREP219       | Stowaway | 42035-42130   |   | TA                                            |
| STOWAWAY41_OS | Stowaway | 64197-64456   | C | TA                                            |
| TYPEU4        | Other    | 99588-99965   | C | ATAGAAAAA                                     |
| TYPEU4        | Other    | 107586-107967 | C | 5'_ATGGAAAAA_3'_ATAGAAAAA                     |
| STOWAWAY46_OS | Stowaway | 118131-118297 | C | 5'_TA_3'_TG                                   |
| WANDERER_OS   | Tourist  | 256304-256538 |   | TTA                                           |
| STOWAWAY34_OS | Stowaway | 272507-272775 | C | TA                                            |
| STOWAWAY18_OS | Stowaway | 375026-375240 |   | TA                                            |
| TNR2A         | Other    | 379214-379368 |   | 5'_CGGTTTCAACTTCGGGG_3'_TCTCTTCAACTTG<br>AGGG |

|               |          |               |   |                                                                                                                                       |
|---------------|----------|---------------|---|---------------------------------------------------------------------------------------------------------------------------------------|
| STOWAWAY47_OS | Stowaway | 379644-379779 | C | TA                                                                                                                                    |
| OSTE23        | Other    | 387783-387977 | C | 5_AAATCAAACAGCTAGCTATAGGAAGGATCAA<br>TGGTGAGCATGCATTTGGTTTTTTTTGC_3_AGAT<br>GACTGTATATGAAAGCAATTAATTAGTCATGA<br>CCCTGTTCTTCGTTTCTTTGC |
| STOWAWAY41_OS | Stowaway | 391305-391560 |   | TA                                                                                                                                    |
| STOWAWAY47_OS | Stowaway | 393192-393338 |   | TA                                                                                                                                    |
| MUDRN1_OS     | MuDR     | 410706-411443 | C | 5_GTATATTTCA_3_GTATACATTCT                                                                                                            |
| STOWAWAY42_OS | Stowaway | 413022-413264 |   | TA                                                                                                                                    |

---

**Table S5 Pair-wise relative rate test of duplicated genes between *O. minuta* and its diploid progenitors**

| Gene  | BBvsBBCC_BB |         | CCvsBBCC_CC |         | BBvsCC   |         | BBCC_BBvsBBCC_CC |         |
|-------|-------------|---------|-------------|---------|----------|---------|------------------|---------|
|       | $\chi^2$    | P value | $\chi^2$    | P value | $\chi^2$ | P value | $\chi^2$         | P value |
| 17    | 0.33        | 0.5637  | 1           | 0.31731 | 0.33     | 0.5637  | 0.33             | 0.5637  |
| 18    | 2.67        | 0.10247 | 0.2         | 0.65472 | 3.52     | 0.06057 | 0.62             | 0.43277 |
| 19    | 2           | 0.1573  | -           | -       | 0.14     | 0.70546 | 1.8              | 0.17971 |
| 21-1  | -           | -       | 1           | 0.31731 | 0.14     | 0.70546 | 0                | 1       |
| 21-2  | 1           | 0.31731 | 0           | 1       | 1        | 0.31731 | 0.33             | 0.5637  |
| 22    | -           | -       | $\psi$      | $\psi$  | 11.84    | 0.00058 | $\psi$           | $\psi$  |
| 23    | -           | -       | -           | -       | 1        | 0.31731 | 1                | 0.31731 |
| 24    | 3           | 0.08326 | 2           | 0.1573  | 0.11     | 0.73888 | 1                | 0.31731 |
| 25    | -           | -       | -           | -       | -        | -       | -                | -       |
| 26    | 0           | 1       | $\psi$      | $\psi$  | -        | -       | $\psi$           | $\psi$  |
| 29-1  | 0           | 1       | -           | -       | 1.33     | 0.24821 | 1.33             | 0.24821 |
| 29-2  | 2           | 0.1573  | -           | -       | 1.8      | 0.17971 | -                | -       |
| 29-3  | 1           | 0.31731 | 0.33        | 0.5637  | 1        | 0.31731 | 0.67             | 0.41422 |
| 29-4* | -           | -       | -           | -       | 4        | 0.0455  | 4                | 0.0455  |
| 30    | 1           | 0.31731 | 0.33        | 0.5637  | 0        | 1       | 0.09             | 0.76302 |
| 31    | 0           | 1       | 1           | 0.31731 | 0.4      | 0.52709 | 1                | 0.31731 |
| 32    | -           | -       | 1           | 0.31731 | 3.6      | 0.05778 | 2.78             | 0.09558 |
| 33    | -           | -       | 0           | 1       | 1        | 0.31731 | 1                | 0.31731 |
| 34    | 2           | 0.1573  | -           | -       | 0        | 1       | 0.5              | 0.4795  |
| 35    | -           | -       | -           | -       | 0        | 1       | -                | -       |
| 36*   | 5           | 0.02535 | -           | -       | 0.67     | 0.41422 | 4.45             | 0.03481 |
| 38-1  | 1           | 0.31731 | -           | -       | 0.4      | 0.52709 | 2.78             | 0.09558 |



|             |      |         |      |         |      |         |      |         |
|-------------|------|---------|------|---------|------|---------|------|---------|
| <b>38-2</b> | 0    | 1       | 1    | 0.31731 | 0.29 | 0.59298 | 0.6  | 0.43858 |
| <b>39-1</b> | -    | -       | 2.67 | 0.10247 | 5.56 | 0.01842 | 2.57 | 0.10881 |
| <b>40</b>   | 2    | 0.1573  | 1    | 0.31731 | 0.33 | 0.5637  | 2    | 0.1573  |
| <b>41</b>   | 0    | 1       | 1    | 0.31731 | 1.19 | 0.27523 | 1.8  | 0.17971 |
| <b>42</b>   | 2    | 0.1573  | 1    | 0.31731 | 0.09 | 0.76302 | 0.08 | 0.78151 |
| <b>44</b>   | 0    | 1       | 0.33 | 0.5637  | 0.06 | 0.80837 | 0    | 1       |
| <b>45</b>   | -    | -       | 1    | 0.31731 | 0.33 | 0.5637  | 0    | 1       |
| <b>46</b>   | 1    | 0.31731 | -    | -       | 0.08 | 0.78151 | 0.11 | 0.73888 |
| <b>47*</b>  | 1    | 0.31731 | 15   | 0.00011 | 0.6  | 0.43858 | 3.9  | 0.04819 |
| <b>48</b>   | 1    | 0.31731 | 0.2  | 0.65472 | 2.78 | 0.09558 | 3.6  | 0.05778 |
| <b>49</b>   | 1    | 0.31731 | 0    | 1       | 0.14 | 0.70546 | 0.67 | 0.41422 |
| <b>50-1</b> | -    | -       | 2    | 0.1573  | 0.2  | 0.65472 | 0.2  | 0.65472 |
| <b>50-2</b> | 1    | 0.31731 | 1    | 0.31731 | 0    | 1       | 0.25 | 0.61708 |
| <b>51</b>   | 0.33 | 0.5637  | 0.33 | 0.5637  | 0.07 | 0.79625 | 0.6  | 0.43858 |
| <b>52</b>   | 4    | 0.0455  | 0.11 | 0.73888 | 10.9 | 0.29715 | 0    | 1       |
| <b>53</b>   | 2    | 0.1573  | 3    | 0.08326 | 0    | 1       | 0.09 | 0.76302 |

Note: “ $\psi$ ” represents pseudogenes that were excluded from analysis; “-” indicates no estimation. \*These genes have significantly different evolutionary rates, as revealed by pair-wise comparisons.

**Table S6 Pair-wise estimates of Ka/Ks and divergence time among the BB, CC and BBCC genomes**

| Gene | BBCC_BBvsBBCC_CC |                      | BBvsBBCC_BB |                      | CCvsBBCC_CC |                      | BBvsCC |                      |
|------|------------------|----------------------|-------------|----------------------|-------------|----------------------|--------|----------------------|
|      | Ka/Ks*           | Divergent time (Mya) | Ka/Ks       | Divergent time (Mya) | Ka/Ks       | Divergent time (Mya) | Ka/Ks  | Divergent time (Mya) |
| 17   | 0.2267           | 3.63846              | 1.0495      | 0.592307             | 0.3484      | 0.592308             | 0.2284 | 3.615385             |
| 18   | 0.0776           | 9.7                  | 0.5937      | 0.269230             | 0.3934      | 0.546154             | 0.0729 | 9.584615             |
| 19   | 0.3392           | 3.26923              | NA          | NA                   | NA          | NA                   | 0.4768 | 3.269231             |
| 21-1 | 0.1798           | 6.26923              | 0           | 0.353846             | 0.2904      | 0.346154             | 0.1631 | 6.276923             |
| 21-2 | 0.1696           | 7.85385              | NA          | NA                   | 0.4052      | 0.992308             | 0.1618 | 6.5                  |
| 22   | -                | -                    | NA          | NA                   | -           | -                    | 0.5555 | 6.715385             |
| 23   | 0.1492           | 7.66154              | 0           | 0.876923             | NA          | NA                   | 0.1304 | 8.276923             |
| 24   | 0.2379           | 4.8                  | 1.0054      | 0.207692             | 0.2255      | 0.638462             | 0.1413 | 5.092308             |
| 25   | 0                | 4.74615              | 0           | 0.761538             | 0           | 0.769231             | 0      | 4.761538             |
| 26   | -                | -                    | 0           | 1.146153             | -           | -                    | -      | -                    |
| 29-1 | 0.7652           | 28.0308              | -           | -                    | 0           | 2.823077             | 0.5775 | 16.48462             |
| 29-2 | -                | -                    | 1.2386      | 1.284615             | -           | -                    | -      | -                    |
| 29-3 | 0.1757           | 18.2538              | NA          | NA                   | 1.1854      | 1.330769             | 0.1296 | 16.37692             |
| 29-4 | 0.2938           | 13.2769              | 0.1969      | 2.407692             | NA          | NA                   | 0.2609 | 12.91538             |
| 30   | 0.1287           | 7.1                  | 0.6655      | 0.492307             | 0.2486      | 1                    | 0.0974 | 6.807692             |
| 31   | 0.0562           | 8.65385              | 0.4201      | 0.515384             | 0.1039      | 0.515385             | 0.0654 | 8.253846             |
| 32   | 0.2273           | 6.38462              | 0           | 0.507692             | 0.1559      | 1.023077             | 0.3049 | 5.561538             |
| 33   | 0.1005           | 6.21538              | 0           | 0.669230             | 0.1477      | 1.307692             | 0.1426 | 4.384615             |
| 34   | 0.3013           | 5.71538              | NA          | NA                   | 0           | 0.469231             | 0.2242 | 6.207692             |

|                      |            |         |          |          |          |          |         |          |    |
|----------------------|------------|---------|----------|----------|----------|----------|---------|----------|----|
| <b>35</b>            | NA         | NA      | NA       | NA       | NA       | NA       | NA      | NA       | NA |
| <b>36</b>            | 0.1145     | 6.53846 | 1.5552   | 0.2      | 0.1548   | 0.4      | 0.0551  | 6.776923 |    |
| <b>38-1</b>          | 0.2427     | 5.88462 | 0.3314   | 0.784615 | NA       | NA       | 0.1382  | 6.6      |    |
| <b>38-2</b>          | 0.2978     | 7.56154 | NA       | NA       | 0.1632   | 0.9      | 0.3184  | 6.615385 |    |
| <b>39-1</b>          | 0.1368     | 9.24615 | 0        | 0.261538 | 0.9059   | 0.523077 | 0.1656  | 9.569231 |    |
| <b>40</b>            | 0.1659     | 4.21538 | 0.1343   | 2.584615 | NA       | NA       | 0.1919  | 5.215385 |    |
| <b>41</b>            | 0.3349     | 8.94615 | 0.3415   | 0.884615 | 0.3438   | 0.661538 | 0.3291  | 8.846154 |    |
| <b>42</b>            | 0.0798     | 11.2308 | 0.4116   | 0.707692 | 0.2073   | 0.7      | 0.0659  | 12.28462 |    |
| <b>43</b>            | -          | -       | 0.2772   | 0.592307 | -        | -        | 0.4026  | 3.238462 |    |
| <b>44</b>            | 0.3538     | 5.12308 | 0.6469   | 0.223076 | 0.4873   | 0.423077 | 0.3217  | 5.869231 |    |
| <b>45</b>            | 0.1113     | 8.33846 | 0        | 0.976923 | 0.155    | 1.984615 | 0.1706  | 7.261538 |    |
| <b>46</b>            | -          | -       | NA       | NA       | -        | -        | 0.1894  | 7.523077 |    |
| <b>47</b>            | -          | -       | 0.3167   | 0.230769 | -        | -        | 0.135   | 6.569231 |    |
| <b>48</b>            | 0.19       | 7.23846 | 0.1284   | 0.9      | NA       | NA       | 0.2195  | 7.846154 |    |
| <b>49</b>            | 0.0786     | 10.8692 | 0.0853   | 1.423076 | 0.8837   | 0.592308 | 0.1181  | 10.72308 |    |
| <b>50-1</b>          | 0.0327     | 10.7385 | 0        | 0.215384 | 0.6559   | 0.215385 | 0.0343  | 10.23077 |    |
| <b>50-2</b>          | 0.2645     | 4.46923 | 0.1063   | 0.646153 | 0.1059   | 0.646154 | 0.2641  | 4.469231 |    |
| <b>51</b>            | 0.6243     | 9.98462 | NA       | NA       | 0.6912   | 7.746154 | 0.1923  | 6.415385 |    |
| <b>52</b>            | 0.1837     | 8.23077 | 0.7269   | 0.323076 | 0.3742   | 1.123077 | 0.1808  | 6.769231 |    |
| <b>53</b>            | 0.0971     | 5.28462 | 0.2022   | 0.407692 | 0.1295   | 0.946154 | 0.0585  | 5.261538 |    |
|                      | BC_BvsBC_C |         | BBvsBC_B |          | CCvsBC_C |          | BBvsCC  |          |    |
| <b>Average value</b> | 0.2156     | 8.23803 | 0.4015   | 0.871203 | 0.3734   | 1.065659 | 0.20233 | 7.476923 |    |

Ka/Ks: If structural variation existed in the coding sequences between gene pair, we excluded this gene pair from the Ka and Ks calculation (indicated by “-”); “NA” indicates a Ks value of 0.

**Table S7 Expression divergence of duplicated genes in allotetraploid *O. minuta***

| Gene code                   | BB-bias | CC-bias | Both transcription | Failure amplification |   |
|-----------------------------|---------|---------|--------------------|-----------------------|---|
| 17                          |         | √       |                    |                       |   |
| 18                          |         |         | √                  |                       |   |
| 19                          |         | √       |                    |                       |   |
| 21-1                        |         |         |                    | F                     |   |
| 21-2                        | √       |         |                    |                       |   |
| 22                          |         |         | √                  |                       |   |
| 23                          |         |         | √                  |                       |   |
| 24                          | √       |         |                    |                       |   |
| 25                          |         |         | √                  |                       |   |
| 26                          |         |         | √                  |                       |   |
| 30                          |         |         |                    | F                     |   |
| 31                          |         |         | √                  |                       |   |
| 32                          |         |         | √                  |                       |   |
| 33                          |         |         | √                  |                       |   |
| 34                          |         | √       |                    |                       |   |
| 35                          |         |         |                    | F                     |   |
| 36                          |         |         | √                  |                       |   |
| 38-1                        |         |         | √                  |                       |   |
| 38-2                        | √       |         |                    |                       |   |
| 39-1                        |         |         | √                  |                       |   |
| 40                          |         |         | √                  |                       |   |
| 42                          |         |         | √                  |                       |   |
| 43                          | √       |         |                    |                       |   |
| 44                          |         |         |                    | F                     |   |
| 45                          |         |         | √                  |                       |   |
| 46                          |         |         | √                  |                       |   |
| 47                          |         |         | √                  |                       |   |
| 48                          |         |         |                    | F                     |   |
| 49                          | √       |         |                    |                       |   |
| 50-1                        |         |         | √                  |                       |   |
| 50-2                        |         |         | √                  |                       |   |
| 51                          |         |         | √                  |                       |   |
| 52                          | √       |         |                    |                       |   |
| 53                          |         |         | √                  |                       |   |
| <b>Total analysis genes</b> | 34      | 6       | 3                  | 20                    | 5 |

Note: “√” indicates gene expression; “F” indicates failure in cDNA-SSCP analysis.

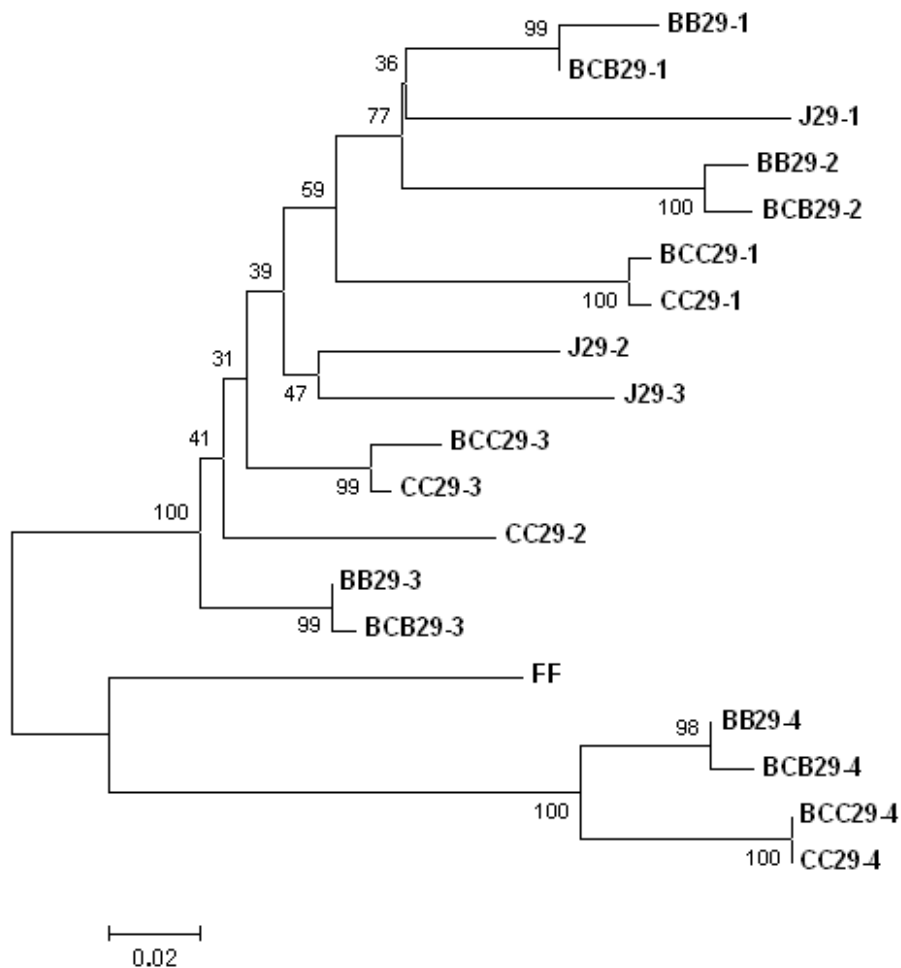

**Figure S1 Phylogenetic analysis of Gene 29 clusters.** Gene 29-4 in the BB, BBCC and CC genomes are clustered with FF gene 29, which is the only one in the FF genome. This result suggests that 29-4 is an ancient copy. After amplification, this copy was lost in the AA genome. J represents the rice genome, BB represents *O. punctata*, BCB and BCC represent the BB and CC-subgenomes in *O. minuta* and CC represents the *O. officinalis* genome. The phylogenetic relationship was constructed by the neighbor joining method with 500 bootstraps in MEGA5.2.

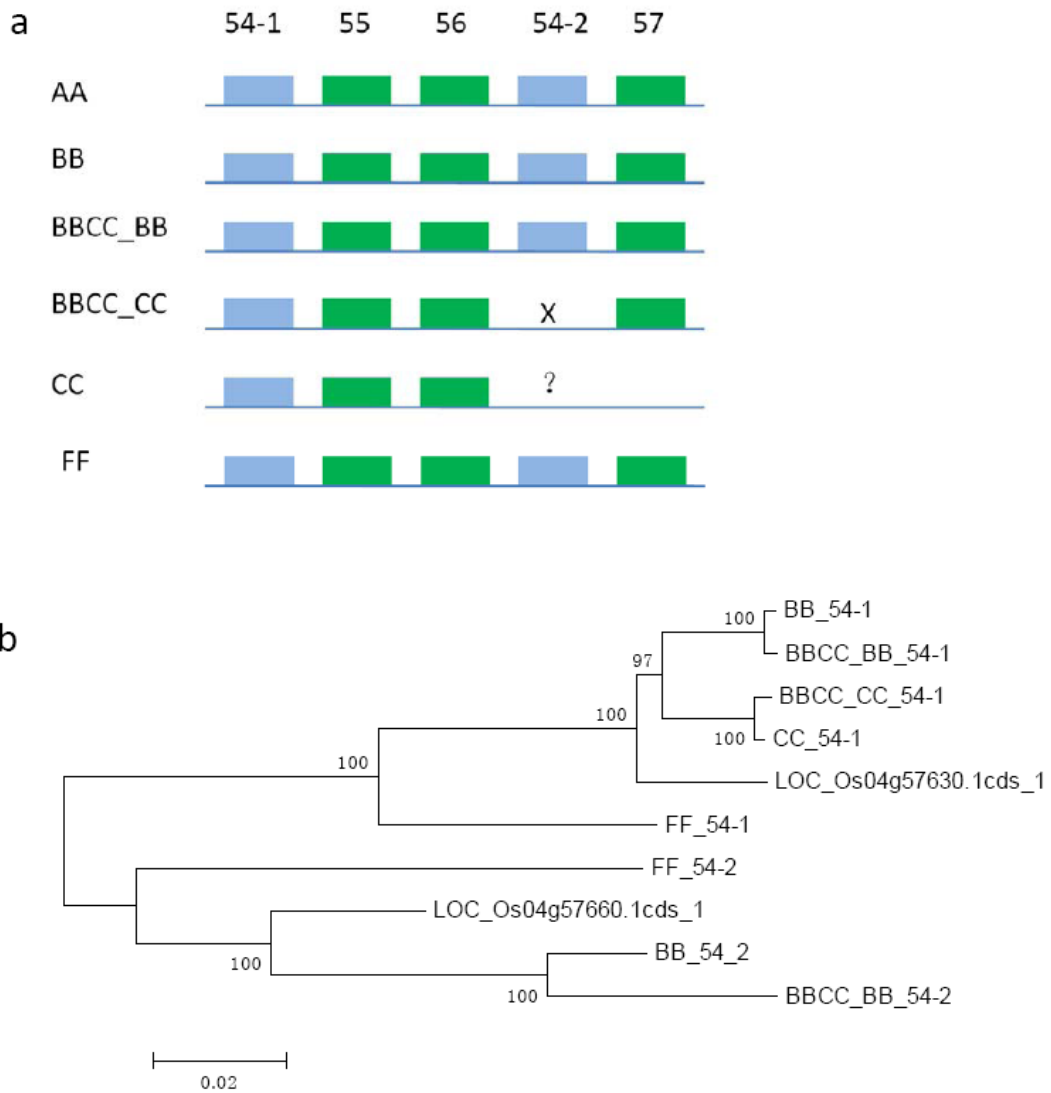

**Figure S2 Evolutionary analysis of Gene 54 clusters.** a) Gene content is well-conserved among *Oryza* species. “X” indicates a deletion and “?” indicates no sequence information. BB sequences were extracted from the unpublished draft sequence of *O. punctata*. b) The phylogenetic tree was built with the Neighbor-Joining method implemented in MEGA 5.2. *Japonica* genes are 57630(54-1) and 57660 (54-2).

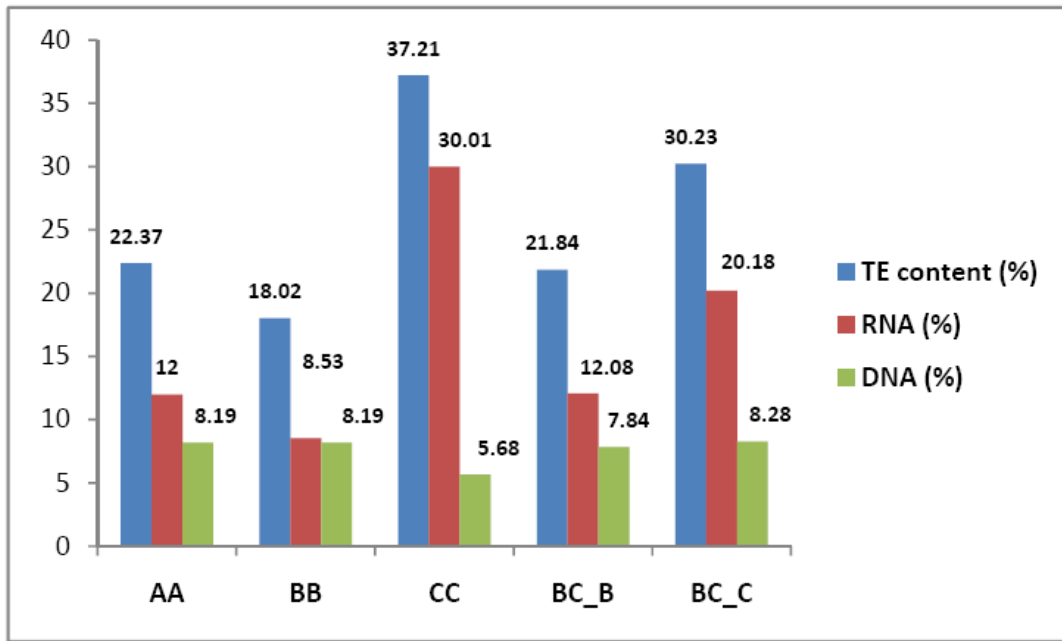

**Figure S3 TE contents in five *Oryza* species.** AA: *O. sativa* ssp. *japonica*, BB: *O. punctata*, CC: *O. officinalis*, BC\_B: BB subgenome in *O. minuta* and BC\_C: CC subgenome in *O. minuta*. RNA: RNA retrotransposon content, DNA: DNA transposon content and TE content: total transposon content.

(a)

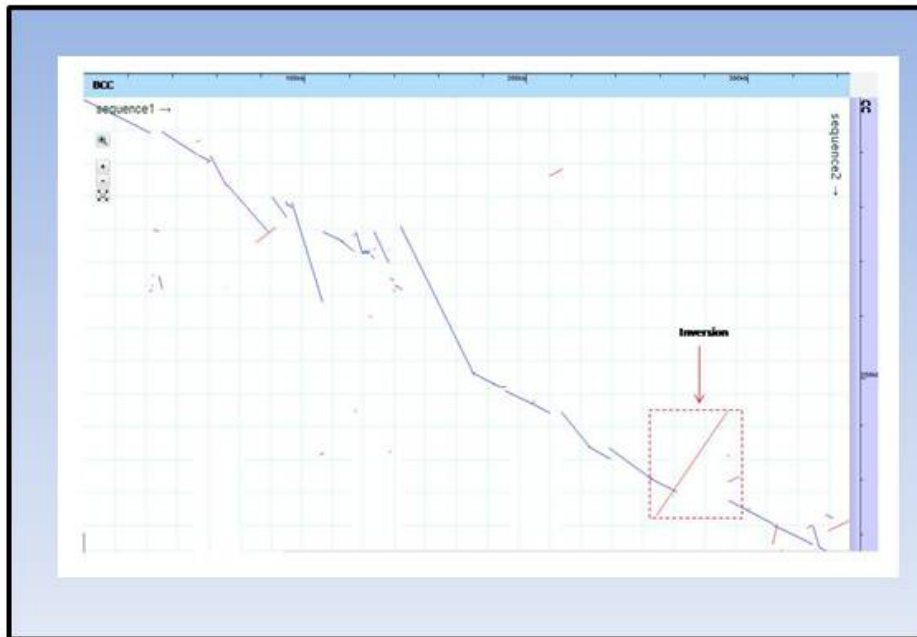

(b)

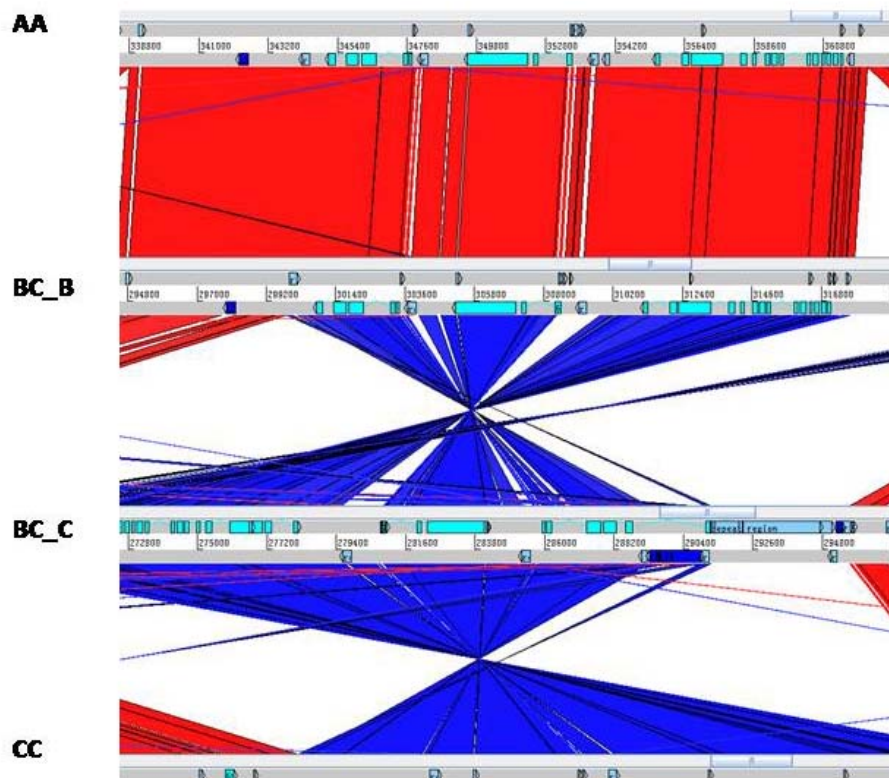

**Figure S4 Large inversion detected in the CC subgenome of *O. minuta*.** Comparative genomic analysis revealed a ~40 kb inversion containing three genes. The results were obtained using two independent approaches; (a) shuffle-LAGEN results and (b) ACT results.



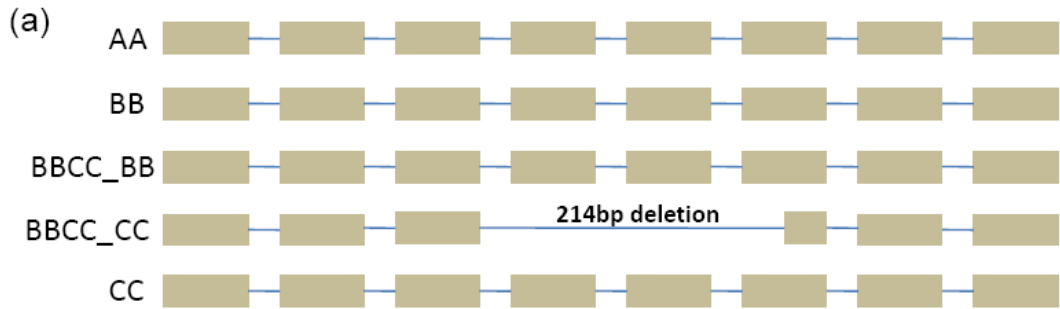

>LOC\_Os04g57190

MAAVPSAAAPPVPVSPGERWPPLESSPDVFNQLMWSLGVPE DVAEFHDVYSLDADAL  
EMVPQPVLA VVFCFPDPTQDASNPSQHLLITGEKETLFFIKQIESLGNACGTIALLHAVGN  
AYSEISLENSFLDMFIKSTSGMTSYERAVFLEKDDDMARAHLSAASAGDTKLSDDVEEH  
YICFVECDGTLYELDGMKPGPINHG PSSSKSLLQLVLFCELGVA AVMSQNR T\*

>BBCC\_CC\_22

MAALSTSSAAPAPVSPDERWPPLESSPDVFNQFMWSLGVPE DVAEFHDVYSLDADALE  
MVPQPVLA VVFCFPDPTQDARNPSQHVLVTGEKLPVLVTQSYLTTLKSIIVLSNVMEHS  
MSLMV\*SLDQ\*IMACHLLKAYCRYRDFVNWV LQLSCL\*IEH?

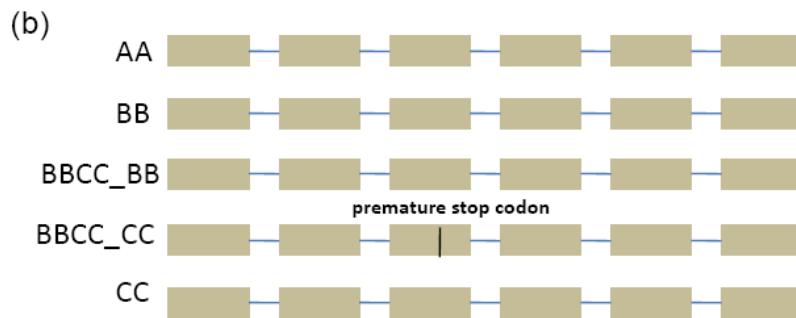

>LOC\_Os04g57230.2 .

MAAAAAMAASRLLHLRPELGLRLRSRALIPYPSWTKAMGRCRYE PPRRLSSCRRAKNE  
RPWRSSSNEQLTDGDGTAKYMGRNFPDEFAQLSLEEEESDDEVH GISETMVKDVEKAAVE  
LLAGRAFTVSDLRKKLRAKKFPDNAVDSVIADFKSRG LLNDGYA ESFSRSRWLSSTWGP  
KRIKQALRQKGVQDAEVDQATRRVFQDGHSNQ TMYGISED SMDHLFEQA AKQWQRGQSLP  
LENRRARVVRWLQYRGFNWAVTNAIVRKLEAQKPP\*

>BBCC\_CC\_26 .

MAAAAAMAASRLLHLRPKLGLCLRSRALIPSASWTNGMGRFRYEPSPRRLSSCRRAKNE  
RPWWSSSDEQLTHGDDGDGTAKYIGKNFPDEFAHLSLEEEETTMRCAESAKLW\*KMWRRL  
RSSCLLAEHSQFQTLGRNYVLR SFLIMQLIL\*LLISSQGVC\*MIVIMRNL FHDLDGYHQL  
GTQSV\*NRHFAKKGCKMQK\*TRRQGEYSKMVIQTRQCMASQRIQWIISLRQLNSGSGAK  
ACPLRIAVHA\*\*GGFSTEGSTGL\*RMPLSGSWRHSNLP

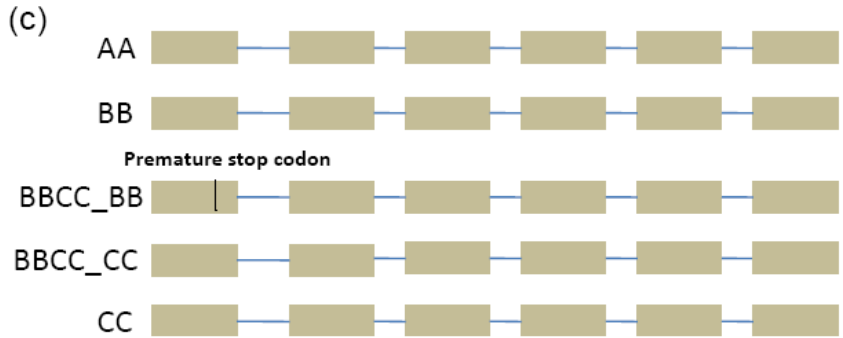

```
>LOC_Os04g57390.1
MEPATSRAPRSRFVVWLHGLGDTGRANEFLADSFPTTAAFADARWAFPTAPTAPVTCNRGMLMPSW
FDIHDAPITSVSVRDEEDVLRVQSVHAMIDREIAAGTNPQDVVFVGLSQGGALGIASVLLHPKTLGGC
AVFSGFLPFNSSFAVRVTAQAKKLQCGLQTPVLWIHQAGSLIPIKEGRDGIKFLRGLGMSCEFKVYDRL
GHSLEYEYDYCQRWVEKILHRSGREGLIRRVSRNIFLCSNLFNSS
>BBCC_BB_38
MEPTTSRAPVPLRGVAARPR*HRPRQRVPRRQLPHHHHGRRRLRRRPLGLPHRAHHSDDLQPRHAHAL
VVRHPRRAHHFRYAGICKGRGGCTESCPKRARDDRRGYRGRDESARRVRFWT+PGRCVGHSKRAALP
ENFGRMCGIQWLPSL#FVFCCQSHRTSKEATICLADTRFVDPWATDSLTPIGEGRDGTKFLRGLGMSCE
FKVYDRLGHSLEYEYDYCQRWVDKILRRSRREGLVRWVSRNICLNNLFCNSYHF
```

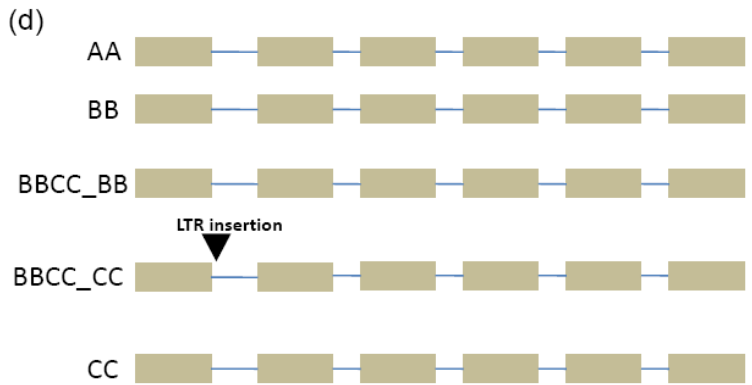

```
>LOC_Os04g57480.2
MARNKKKVAVAAAPKARKPKRDAEKKFKKADMTEFRAQLDSLGLKIIIELEGNEEEMKYRAMIVQYIKEHRVDFEFPFIEDEEPEFEKYCDS
MLELDGTWAGHMELQAASILKRKNICIHMLNSPRWYIRNFSREATSMIHLSYHQGEHYNSVRLREDPCQGPAMPVVIKADANVASTSNN
AQTKAKDLKSSDRSKYDHISVKLVMAGTGCSNIAAVEQVLKMDMGDIDAAIEYMLAEQLILGSDDADGDPYLDYACDAEYVQTIEDELSM
KQDESQDLDEHKKEEKDCSSKGETAQKHNSHSHKKGSKTKCEKSCGSARKHKPSCNLATTVASREPPKTTAPSREPPKTKGGQKGGKQKGGKQK
KKEQDETPAIRDHDSKVAPDLGALCI
>BBCC_CC_43
MARNKKKVAVAAAPKARKPKRDAEKKFKGKKADMTEFRAQLDSLGLKIIIEVSADGNCFRAMGDQLEGNEEHIKYRAMIVQYIKEHRVDF
EFPFIEDEEPEFEKIL*LYD*GWDLGWSYGVASSFYSHKHKHMLHA#LTTMVHKNFF*S*SYQYDSFIVSSE*ALQ+CQTEGRSMSRSCNADY
YQGRQCQS+HKQ#CSNKSGLLEEIFRQIKV*SYIG#IGDGWNWWMF#CRCS*TGFERHGW*R*CCYRVHVS*ATNIGFQ*CGWRSLGLC
M**VYTDHRG*V+HEAG*ESTG*AQERRKRLF+QRRNSSQTQQFTF#KKGKVKNQGMMLLWIC+EAQAF#FSHDCSIKRTSKNNCTIERTSK
DQRWPRERPEGEEAKEERTS*NTSHPGS*F#SCTRSRSSLHM
```

**Figure S5 Pseudogene annotation.** The comparison for gene structures among five *Oryza* genomes and amino acid sequences for normal (*japonica*) and truncated products (pseudogene) for each set of orthologs were presented. (a) Gene 22: There is a 214 bp deletion in the CDS region in the BBCC\_CC genome, which caused this gene to become a pseudogene. (b) Gene 26: An single-base-pair deletion occurred in the third exon of gene

26 in the CC subgenome of *O. minuta*. (c) Gene 38-3: A two-base-pair deletion occurred in gene 38-3 in the BB subgenome of *O. minuta*, which led to a premature stop codon. (4) Gene 43: An LTR retrotransposon was inserted near the first exon of gene 43 in the CC subgenome of *O. minuta*. RT-PCR and cDNA-SSCP experiments revealed this copy is not expressed. All sequences variations were reexamined and validated against the original Sanger sequences.

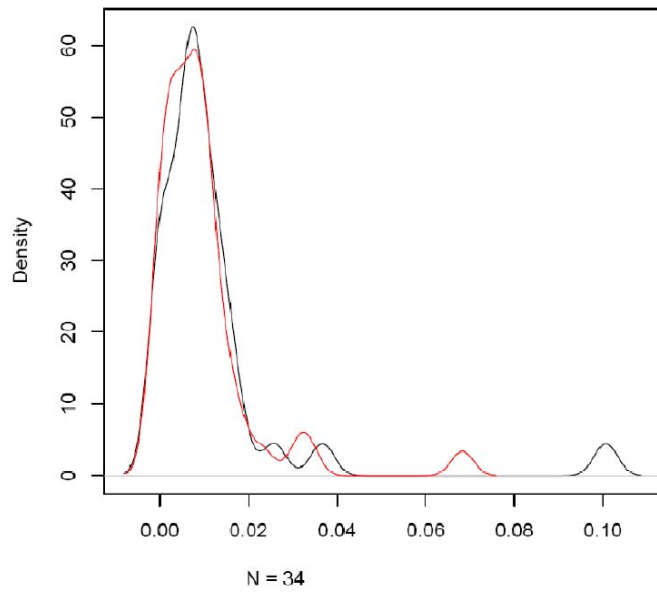

**Figure S6 Distributions of Ks density for homoeologous genes between two subgenomes in *O. minuta* and corresponding diploid genomes.** Most Ks are estimated to be around 0.01, and BB- and CC-type genomes show similar distribution patterns. Red line represents BC\_B vs. BB and black line represents BC\_C vs. CC. X-axis indicates Ks value, Y-axis indicates the density of the Ks value. N indicates gene number (which represents the genes used in the Ks calculation after excluding pseudogenes and genes with great structural variation).

## Coexpressed genes

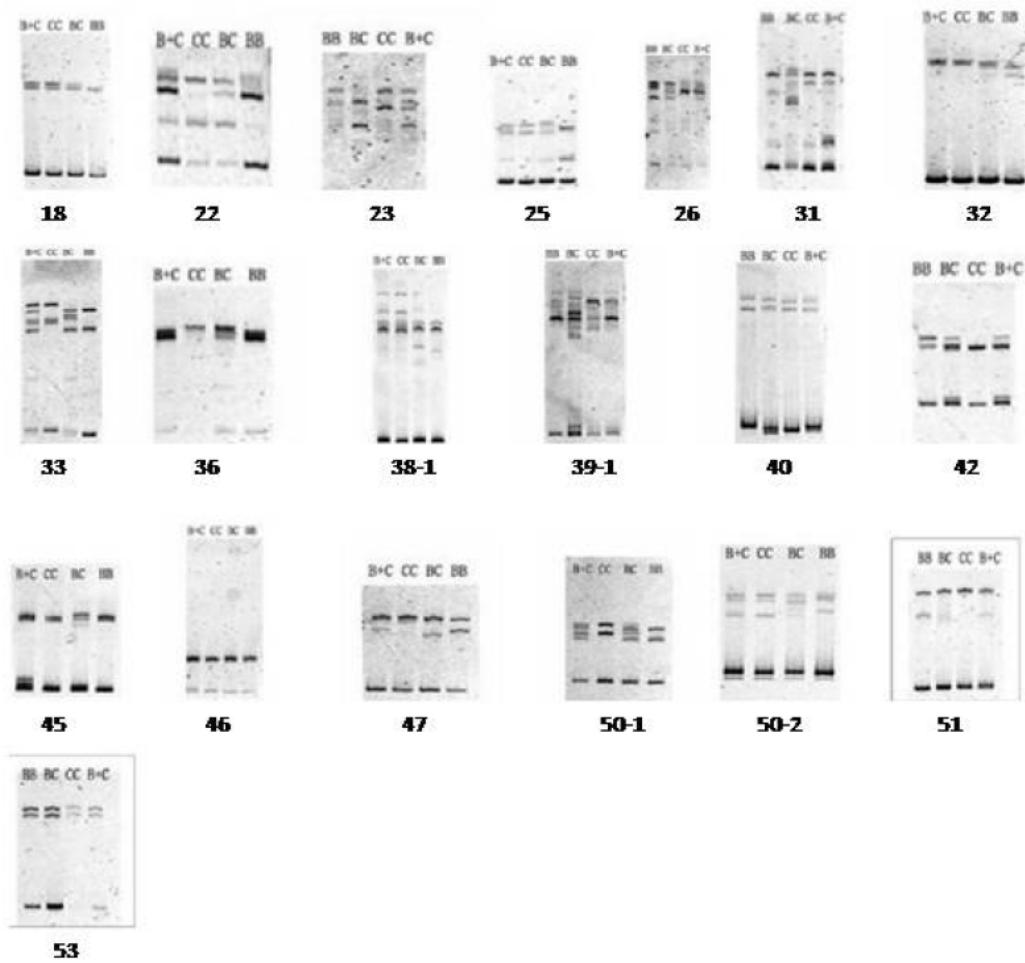

**Figure S7 Results of cDNA-SSCP analysis with 34 pairs of duplicated genes.** There were three types of cDNA-SSCP results: coexpressed, expressed in both BB and CC *O. minuta*; BC\_B bias, BB copy expressed; and BC\_C bias, CC copy expressed. The materials used to conduct cDNA-SSCP analysis included BB (*O. punctata*), CC (*O. officinalis*), BC (*O. minuta*) and B+C (mixture of *O. punctata* and *O. officinalis*).

BBCC\_CC bias genes

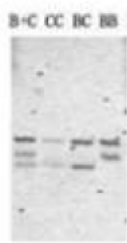

**17**

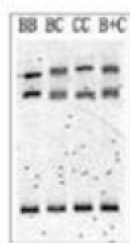

**19**

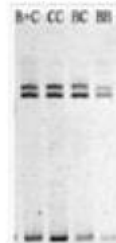

**34**

BBCC\_BB bias genes

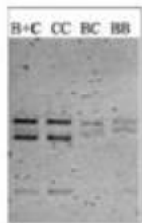

**21-1**

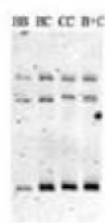

**24**

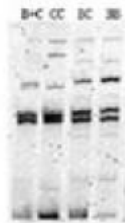

**38-2**

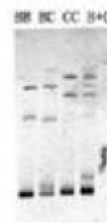

**43**

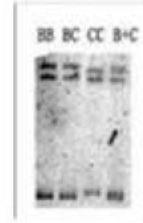

**49**

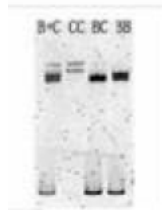

**52**

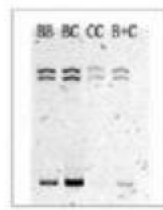

**53**

Figure S7 Continued
