# Supplementary material for: Genomic, regulatory and epigenetic mechanisms underlying duplicated gene evolution in the natural allotetraploid Oryza minuta
Source: PubMed Central journal article supplement (PMC3890553; doi:10.1186/1471-2164-15-11), 2014-01-06
Supplement: 1471-2164-15-11-S2.pdf [file 1471-2164-15-11-S2.pdf]

Table S1 Primer information in this study.

| TIGR V6 name<br>(LOC_OS04g) | Gene<br>number | Primer name  | Sequence (5'-3')           | Length<br>(bp) | Tm(°C) |
|-----------------------------|----------------|--------------|----------------------------|----------------|--------|
| <b>For cDNA-SSCP</b>        |                |              |                            |                |        |
| 57130                       | 17             | s130-F       | CCGCTGCTCGGTTTCCTC         | 161            | 62     |
|                             |                | s130-R       | CGAGTTCCGGTGCAGGCT         |                |        |
| 57140                       | 18             | s140-1-F     | GTCTCACCAGCAGAGTCCAAC      | 182            | 55     |
|                             |                | s140-1-R     | TCCAGGTCGTCGTCTTCACTA      |                |        |
| 57150                       | 19             | s150-F       | GATGGATGACCCGCTTATGT       | 218            | 55     |
|                             |                | s150-R       | TTTCCCAGTCTCCAGTGCTA       |                |        |
| 57180                       | 21-2           | S180-F       | CACCAACTTACAGGGAGAAA       | 217            | 50     |
|                             |                | S180-R       | CCATAATCAGAGTGAGTAGCC      |                |        |
| 57190                       | 22             | S190F        | CTCGAGTCGAGCCCCGACGT       | 143            | 61     |
|                             |                | S190R        | CTGGGTTGGATCGGGGAAGC       |                |        |
| 57200                       | 23             | S200-F       | CCAAAAGCTGACGGTGGTCG       | Jap:294        | 58     |
|                             |                | S200-R       | CAGCAGATGACGCACGAGTT       | Other<294      |        |
| 57210                       | 24             | S210-F       | AGAAAGCAATACAAGGACAC       | 231            | 51     |
|                             |                | S210-R       | AAATCCAGTAAGTTTGAGGG       |                |        |
| 57220                       | 25             | S220-F       | CAAAGGTCCTCCTGTCAAT        | 118            | 51     |
|                             |                | S220-R       | CGAGCGGTGGATTCATACTT       |                |        |
| 57230                       | 26             | 230-SS&STR-F | CTCCCGTGCCCTAATCCCCT       | 290            | 64     |
|                             |                | 230-SS&STR-R | CAGCCTTCTCCACATCTTTCACCA   |                |        |
| 57300                       | 31             | S300-F       | GCT GGA GGT TGT CTG CAT GG | 287            | 52     |
|                             |                | S300-R       | GGA CAC GCT CCG ATG AAC GC |                |        |
| 57310                       | 32             | S310-F       | GGGAAAGAAACAAATCCTATG      | 199            | 50     |
|                             |                | S310-R       | GCATAAATCCAACCAAGTC        |                |        |
| 57320                       | 33             | S320-F       | GGT GGC CGT CGA GGA GTC CT | 196            | 60     |
|                             |                | S320-R       | GCG TAG TTG CGG TCA CGG TA |                |        |
| 57330                       | 34             | S330-F       | GCGACACCTTCTTCTCCACC       | 287            | 55     |
|                             |                | S330-R       | CCACCCTAGCGCATACCC         |                |        |
| 57350                       | 36             | S350-F       | TTCGTGAAGCGTTCGAGGTC       | 290            | 55     |
|                             |                | S350-R       | AGATCGGGGATGTCGTAGGC       |                |        |
| 57370                       | 38-1           | E57370-F     | AACGAGCCCATCCGCAACT        | 355            | 62     |
|                             |                | E57370-R     | AACCGAAAGGCACCCACCC        |                |        |
| 57380                       | 38-2           | E57380-F     | TTCCTATTACTGCTAGAACTGC     | 287            | 52     |
|                             |                | S57380-R     | CATGCCATGAAACCACAAAAC      |                |        |
| 57400                       | 39-1           | E57400-F     | CGGCAACCTCAACTTCGTCT       | 311            | 60     |
|                             |                | E57400-R     | CCATGTAATCCGCCATGTGC       |                |        |
| 57420                       | 40             | E57420-F     | CACTCCCTAAACTAGAGGTCTCA    | 314            | 55     |
|                             |                | E57420-R     | AATGATGGTATCTAAGTGCCTTG    |                |        |
| 57440                       | 42             | E57440-F     | GCTGTCCGGCTATGGCACT        | 164            | 55     |
|                             |                | E57440-R     | CCGCTCTTGGTAGGGTATG        |                |        |

|       |      |          |                       |     |    |
|-------|------|----------|-----------------------|-----|----|
| 57480 | 43   | E57480-F | CGGTAAATTGGTGATGG     | 392 | 50 |
|       |      | E57480-R | TGCTACAGTCGTGGCTAA    |     |    |
| 57500 | 45   | E57500-F | GATGAGTGGTGGTGATGG    | 282 | 50 |
|       |      | E57500-R | GCCAAAGGAACGGAGATA    |     |    |
| 57510 | 46   | E57510-F | TTCAAGGGAGCCAAACAC    | 210 | 53 |
|       |      | E57510-R | AGCAACGGCATCAAAGAG    |     |    |
| 57520 | 47   | S520F    | TTCCTGCCATTCTTCTGATT  | 195 | 54 |
|       |      | S520R    | TTTTACCTTGTTTGCCGATA  |     |    |
| 57540 | 33   | E57540-F | GCTTGAAGAGGGAGCAGAA   | 129 | 53 |
|       |      | E57540-R | TCTCGGAGTTTGAGGTTGA   |     |    |
| 57550 | 34-1 | S550F    | AATCAAAGGGTAACCAAAAT  | 236 | 50 |
|       |      | S550R    | TTAGGCCAGAAGACTGTATC  |     |    |
| 57560 | 34-2 | S560F    | ATTCGCTTGTTTCTTATTCC  | 245 | 53 |
|       |      | S560R    | CATCTCCTCCCTCATGATAAT |     |    |
| 57590 | 35   | E57590-F | GGAGTAGTCCAGAACCGTAA  | 213 | 51 |
|       |      | E57590-R | TATCCGTTTGTTTGAGCC    |     |    |
| 57600 | 36   | E57600-F | TCCGAGAAAGAGCGAGAT    | 206 | 52 |
|       |      | E57600-R | CGATGAGGGAAGTTGTGC    |     |    |
| 57610 | 37   | S610F    | ACAGCCGTTTCACTATTTTC  | 181 | 50 |
|       |      | S610R    | CTAACTTCAGTTATCGTCCC  |     |    |

**For methylation analysis**

|     |    |          |                                    |     |  |
|-----|----|----------|------------------------------------|-----|--|
| 150 | 19 | BB-1-F   | TGGGAATTTGTAGTTTATGTTTAGATG        | 331 |  |
|     |    | BB-1-R   | ACTAATCCAATAAACCCATCCTATC          |     |  |
|     |    | BB-2-F   | TGTTTTTGAGAGTATTGTTTTTTTT          | 226 |  |
|     |    | BB-2-R   | ATATAAACCCCATACCTTTCCCT            |     |  |
|     |    | BC_B-1-F | ATTATTAGTTTAGTTTATTATTTTTTTT       | 237 |  |
|     |    | BC_B-1-R | ACTCATCCTATCAATTACTAAAATC          |     |  |
|     |    | BC_B-2-F | GATAGGATGAGTTATAGGTGGTAAA          | 572 |  |
|     |    | BC_B-2-R | TCAACCTCTCTATCCCTCTAATTTATAA<br>A  |     |  |
|     |    | BC_C-1-F | TTTTAATGGGATAATTTTTAATGTA          | 378 |  |
|     |    | BC_C-1-R | ACCCATCCTATCAATTACTAAAATC          |     |  |
|     |    | BC_C-2-F | TTTATTTTATGTTGTTGTTTTTTTT          | 296 |  |
|     |    | BC_C-2-R | AAAACCTAACCTCTAAATCCAAC            |     |  |
|     |    | BC_C-3-F | TTTTTTTTGTTTTGAGTGTGTGTT           | 345 |  |
|     |    | BC_C-3-R | CCAACTAATATCTAATTACCATACCTA<br>ATA |     |  |
|     |    | BC_C-4-F | GATTTGGTATTTATGGATATTAGGTTTG       | 316 |  |
|     |    | BC_C-4-R | ATAAAACAAAAAACACCTACCCAC           |     |  |
|     |    | CC-1-F   | GAGTTTAGGTGGTATAGATTAAGTTGA<br>TG  | 218 |  |
|     |    | CC-1-R   | AAAAACCTAACCTCTAAATCCAAC           |     |  |
|     |    | CC-2-F   | TTTATTTTATGTTGTTGTTTTTTTT          | 481 |  |
|     |    | CC-2-R   | AACTCACAATAATACCTTATAAAC           |     |  |

---
